# Supplementary material for: Data for improvement and clinical excellence: report of an interrupted time series trial of feedback in long-term care
Source: Springer Nature journal article supplement (doi:10.1186/s13012-014-0161-5), 2014-11-10
Supplement: MOESM1 [file 9772854]

The TIDieR (Template for Intervention Description and Replication) Checklist\*:

Information to include when describing an intervention and the location of the information

| Item number | Item                                                                                                                                                                                                                                                                                                                | Where located **                        |                                                                                                                                                              |
|-------------|---------------------------------------------------------------------------------------------------------------------------------------------------------------------------------------------------------------------------------------------------------------------------------------------------------------------|-----------------------------------------|--------------------------------------------------------------------------------------------------------------------------------------------------------------|
|             |                                                                                                                                                                                                                                                                                                                     | Primary paper (page or appendix number) | Other † (details)                                                                                                                                            |
| 1.          | <b>BRIEF NAME</b><br>Provide the name or a phrase that describes the intervention.                                                                                                                                                                                                                                  | _title_____                             | _____                                                                                                                                                        |
| 2.          | <b>WHY</b><br>Describe any rationale, theory, or goal of the elements essential to the intervention.                                                                                                                                                                                                                | Pages 4-7                               | Also in protocol papers- see below and <a href="http://www.implementationscience.com/content/5/1/49">http://www.implementationscience.com/content/5/1/49</a> |
| 3.          | <b>WHAT</b><br>Materials: Describe any physical or informational materials used in the intervention, including those provided to participants or used in intervention delivery or in training of intervention providers.<br>Provide information on where the materials can be accessed (e.g. online appendix, URL). | References to protocol papers           | <a href="http://www.implementationscience.com/content/5/1/74">http://www.implementationscience.com/content/5/1/74</a>                                        |
| 4.          | Procedures: Describe each of the procedures, activities, and/or processes used in the intervention, including any enabling or support activities.                                                                                                                                                                   | Pages 7-8                               | _____                                                                                                                                                        |
| 5.          | <b>WHO PROVIDED</b><br>For each category of intervention provider (e.g. psychologist, nursing assistant), describe their expertise, background and any specific training given.                                                                                                                                     | Pages 7-8                               | _____                                                                                                                                                        |

|                          |                                                                                                                                                                                          |                     |                                                 |
|--------------------------|------------------------------------------------------------------------------------------------------------------------------------------------------------------------------------------|---------------------|-------------------------------------------------|
| <b>HOW</b>               |                                                                                                                                                                                          |                     |                                                 |
| 6.                       | Describe the modes of delivery (e.g. face-to-face or by some other mechanism, such as internet or telephone) of the intervention and whether it was provided individually or in a group. | Pages 7-8           | Also in protocol paper                          |
| <b>WHERE</b>             |                                                                                                                                                                                          |                     |                                                 |
| 7.                       | Describe the type(s) of location(s) where the intervention occurred, including any necessary infrastructure or relevant features.                                                        | Page 7              | _____                                           |
| <b>WHEN and HOW MUCH</b> |                                                                                                                                                                                          |                     |                                                 |
| 8.                       | Describe the number of times the intervention was delivered and over what period of time including the number of sessions, their schedule, and their duration, intensity or dose.        | Pages 7 & 8         | Protocol paper                                  |
| <b>TAILORING</b>         |                                                                                                                                                                                          |                     |                                                 |
| 9.                       | If the intervention was planned to be personalised, titrated or adapted, then describe what, why, when, and how.                                                                         | No tailoring        | _____                                           |
| <b>MODIFICATIONS</b>     |                                                                                                                                                                                          |                     |                                                 |
| 10.*                     | If the intervention was modified during the course of the study, describe the changes (what, why, when, and how).                                                                        | Described on page 8 | _____                                           |
| <b>HOW WELL</b>          |                                                                                                                                                                                          |                     |                                                 |
| 11.                      | Planned: If intervention adherence or fidelity was assessed, describe how and by whom, and if any strategies were used to maintain or improve fidelity, describe them.                   |                     | Described in companion process evaluation paper |
| 12.*                     | Actual: If intervention adherence or fidelity was assessed, describe the extent to which the intervention was delivered as planned.                                                      | _____               | As above.                                       |

\*\* **Authors** - use N/A if an item is not applicable for the intervention being described. **Reviewers** – use ‘?’ if information about the element is not reported/not sufficiently reported.

† If the information is not provided in the primary paper, give details of where this information is available. This may include locations such as a published protocol or other published papers (provide citation details) or a website (provide the URL).

‡ If completing the TIDieR checklist for a protocol, these items are not relevant to the protocol and cannot be described until the study is complete.

\* We strongly recommend using this checklist in conjunction with the TIDieR guide (see *BMJ* 2014;348:g1687) which contains an explanation and elaboration for each item.

\* The focus of TIDieR is on reporting details of the intervention elements (and where relevant, comparison elements) of a study. Other elements and methodological features of studies are covered by other reporting statements and checklists and have not been duplicated as part of the TIDieR checklist. When a **randomised trial** is being reported, the TIDieR checklist should be used in conjunction with the CONSORT statement (see [www.consort-statement.org](http://www.consort-statement.org)) as an extension of **Item 5 of the CONSORT 2010 Statement**. When a **clinical trial protocol** is being reported, the TIDieR checklist should be used in conjunction with the SPIRIT statement as an extension of **Item 11 of the SPIRIT 2013 Statement** (see [www.spirit-statement.org](http://www.spirit-statement.org)). For alternate study designs, TIDieR can be used in conjunction with the appropriate checklist for that study design (see [www.equator-network.org](http://www.equator-network.org)).
