# Supplementary material for: Data for improvement and clinical excellence: report of an interrupted time series trial of feedback in long-term care
Source: Springer Nature journal article supplement (doi:10.1186/s13012-014-0161-5), 2014-11-10
Supplement: MOESM2 [file 9772854]

**Segmented Regression on Interrupted Time Series comparing Organization 1 (mature use of RAI data) with Organization 2 (recent adoption of RAI)**

log: e:\segreg, 20120510.log  
log type: text  
opened on: 10 May 2012, 10:59:01

**A. Both organizations combined**

**1) fall**

. prais fall b1 b2 b3 b4 b5

Iteration 0: rho = 0.0000  
Iteration 1: rho = -0.5861  
Iteration 2: rho = -0.6174  
Iteration 3: rho = -0.6176  
Iteration 4: rho = -0.6176  
Iteration 5: rho = -0.6176

Prais-Winsten AR(1) regression -- iterated estimates

| Source   | SS         | df | MS         | Number of obs = | 25     |
|----------|------------|----|------------|-----------------|--------|
| Model    | 680.759987 | 5  | 136.151997 | F( 5, 19) =     | 27.17  |
| Residual | 95.1960183 | 19 | 5.01031675 | Prob > F =      | 0.0000 |
|          |            |    |            | R-squared =     | 0.8773 |
|          |            |    |            | Adj R-squared = | 0.8450 |
| Total    | 775.956005 | 24 | 32.3315002 | Root MSE =      | 2.2384 |

| fall  | Coef.     | Std. Err. | t     | P> t  | [95% Conf. Interval] |
|-------|-----------|-----------|-------|-------|----------------------|
| b1    | -.5049905 | .3940173  | -1.28 | 0.215 | -1.329678 .3196972   |
| b2    | 1.459094  | 1.492823  | 0.98  | 0.341 | -1.665421 4.583609   |
| b3    | .9264297  | .4007524  | 2.31  | 0.032 | .0876453 1.765214    |
| b4    | -1.410525 | 1.736931  | -0.81 | 0.427 | -5.045965 2.224914   |
| b5    | -.1566811 | .4007524  | -0.39 | 0.700 | -.9954656 .6821034   |
| _cons | 20.89381  | 1.524642  | 13.70 | 0.000 | 17.7027 24.08492     |
| rho   | -.6175957 |           |       |       |                      |

Durbin-Watson statistic (original) 3.165902  
Durbin-Watson statistic (transformed) 2.659501

**2) pain**

. regress pain b1 b2 b3 b4 b5

| Source   | SS         | df | MS         | Number of obs = | 25     |
|----------|------------|----|------------|-----------------|--------|
| Model    | 1263.78947 | 5  | 252.757894 | F( 5, 19) =     | 10.52  |
| Residual | 456.432276 | 19 | 24.0227514 | Prob > F =      | 0.0001 |
|          |            |    |            | R-squared =     | 0.7347 |
|          |            |    |            | Adj R-squared = | 0.6648 |
| Total    | 1720.22175 | 24 | 71.6759062 | Root MSE =      | 4.9013 |

| pain  | Coef.     | Std. Err. | t     | P> t  | [95% Conf. Interval] |
|-------|-----------|-----------|-------|-------|----------------------|
| b1    | .1137145  | 1.171635  | 0.10  | 0.924 | -2.338546 2.565975   |
| b2    | -14.323   | 4.571533  | -3.13 | 0.005 | -23.89133 -4.754676  |
| b3    | -.5419563 | 1.226671  | -0.44 | 0.664 | -3.109408 2.025496   |
| b4    | 3.801195  | 5.236351  | 0.73  | 0.477 | -7.158615 14.761     |
| b5    | .8090988  | 1.226671  | 0.66  | 0.517 | -1.758353 3.376551   |
| _cons | 34.75533  | 4.562863  | 7.62  | 0.000 | 25.20515 44.30551    |

-----  
. estat dwatson

Durbin-Watson d-statistic( 6, 25) = 1.989333

. dwe

Durbin-Watson test with normal p value

| dw     | Prob < dw | Prob > dw |
|--------|-----------|-----------|
| 1.9893 | 0.1250    | 0.8750    |

### 3) depression

. regress depression b1 b2 b3 b4 b5

| Source   | SS         | df | MS         | Number of obs = | 25     |
|----------|------------|----|------------|-----------------|--------|
| Model    | 792.685051 | 5  | 158.53701  | F( 5, 19) =     | 10.42  |
| Residual | 289.177078 | 19 | 15.2198462 | Prob > F =      | 0.0001 |
| Total    | 1081.86213 | 24 | 45.0775887 | R-squared =     | 0.7327 |
|          |            |    |            | Adj R-squared = | 0.6624 |
|          |            |    |            | Root MSE =      | 3.9013 |

| depression | Coef.     | Std. Err. | t     | P> t  | [95% Conf. Interval] |          |
|------------|-----------|-----------|-------|-------|----------------------|----------|
| b1         | -1.860286 | .93258    | -1.99 | 0.061 | -3.812198            | .0916266 |
| b2         | -4.443773 | 3.638778  | -1.22 | 0.237 | -12.05982            | 3.172278 |
| b3         | 3.387978  | .9763867  | 3.47  | 0.003 | 1.344377             | 5.431579 |
| b4         | -1.988513 | 4.16795   | -0.48 | 0.639 | -10.71213            | 6.735107 |
| b5         | -1.418263 | .9763867  | -1.45 | 0.163 | -3.461864            | .6253375 |
| _cons      | 42.92933  | 3.631877  | 11.82 | 0.000 | 35.32773             | 50.53094 |

-----  
. estat dwatson

Durbin-Watson d-statistic( 6, 25) = 2.104927

. dwe

Durbin-Watson test with normal p value

| dw     | Prob < dw | Prob > dw |
|--------|-----------|-----------|
| 2.1049 | 0.2000    | 0.8000    |

**B. Organization 1 (more mature use of RAI data)**

1) fall

. regress fall b1 b2 b3 b4 b5

| Source   | SS         | df | MS         | Number of obs = | 25     |
|----------|------------|----|------------|-----------------|--------|
| Model    | 127.579525 | 5  | 25.5159049 | F( 5, 19) =     | 1.60   |
| Residual | 302.744758 | 19 | 15.9339346 | Prob > F =      | 0.2077 |
|          |            |    |            | R-squared =     | 0.2965 |
|          |            |    |            | Adj R-squared = | 0.1113 |
| Total    | 430.324283 | 24 | 17.9301784 | Root MSE =      | 3.9917 |

| fall  | Coef.     | Std. Err. | t     | P> t  | [95% Conf. Interval] |
|-------|-----------|-----------|-------|-------|----------------------|
| b1    | -1.048571 | .9542068  | -1.10 | 0.286 | -3.045749 .9486063   |
| b2    | 2.290404  | 3.723163  | 0.62  | 0.546 | -5.502265 10.08307   |
| b3    | 1.344945  | .9990294  | 1.35  | 0.194 | -.7460475 3.435937   |
| b4    | -1.780498 | 4.264606  | -0.42 | 0.681 | -10.70642 7.145425   |
| b5    | .6256264  | .9990294  | 0.63  | 0.539 | -1.465366 2.716619   |
| _cons | 21.61333  | 3.716101  | 5.82  | 0.000 | 13.83544 29.39122    |

. estat dwatson

Durbin-Watson d-statistic( 6, 25) = 2.906879

. dwe

Durbin-Watson test with normal p value

| dw     | Prob < dw | Prob > dw |
|--------|-----------|-----------|
| 2.9069 | 0.9207    | 0.0793    |

2) pain

. regress pain b1 b2 b3 b4 b5

| Source   | SS         | df | MS         | Number of obs = | 25     |
|----------|------------|----|------------|-----------------|--------|
| Model    | 1478.02725 | 5  | 295.605449 | F( 5, 19) =     | 7.62   |
| Residual | 737.219407 | 19 | 38.8010214 | Prob > F =      | 0.0004 |
|          |            |    |            | R-squared =     | 0.6672 |
|          |            |    |            | Adj R-squared = | 0.5796 |
| Total    | 2215.24665 | 24 | 92.3019439 | Root MSE =      | 6.229  |

| pain  | Coef.     | Std. Err. | t     | P> t  | [95% Conf. Interval] |
|-------|-----------|-----------|-------|-------|----------------------|
| b1    | 1.581714  | 1.489027  | 1.06  | 0.301 | -1.534855 4.698284   |
| b2    | -18.99339 | 5.809946  | -3.27 | 0.004 | -31.15374 -6.833033  |
| b3    | -2.062868 | 1.558972  | -1.32 | 0.201 | -5.325834 1.200098   |
| b4    | 7.68877   | 6.654861  | 1.16  | 0.262 | -6.240014 21.61755   |
| b5    | .678868   | 1.558972  | 0.44  | 0.668 | -2.584098 3.941834   |
| _cons | 38.84733  | 5.798927  | 6.70  | 0.000 | 26.71004 50.98463    |

. estat dwatson

Durbin-Watson d-statistic( 6, 25) = 2.299409

. dwe

Durbin-Watson test with normal p value

| dw     | Prob < dw | Prob > dw |
|--------|-----------|-----------|
| 2.2994 | 0.3743    | 0.6257    |

### 3) depression

. regress depression b1 b2 b3 b4 b5

| Source   | SS         | df | MS         | Number of obs = | 25     |
|----------|------------|----|------------|-----------------|--------|
| Model    | 392.971405 | 5  | 78.5942809 | F( 5, 19) =     | 3.52   |
| Residual | 424.466226 | 19 | 22.3403277 | Prob > F =      | 0.0203 |
|          |            |    |            | R-squared =     | 0.4807 |
|          |            |    |            | Adj R-squared = | 0.3441 |
| Total    | 817.437631 | 24 | 34.0599013 | Root MSE =      | 4.7266 |

| depression | Coef.     | Std. Err. | t     | P> t  | [95% Conf. Interval] |
|------------|-----------|-----------|-------|-------|----------------------|
| b1         | .1277145  | 1.129863  | 0.11  | 0.911 | -2.237116 2.492545   |
| b2         | -8.521593 | 4.408545  | -1.93 | 0.068 | -17.74878 .705597    |
| b3         | .9817909  | 1.182937  | 0.83  | 0.417 | -1.494124 3.457706   |
| b4         | .2737377  | 5.04966   | 0.05  | 0.957 | -10.29532 10.8428    |
| b5         | -1.320934 | 1.182937  | -1.12 | 0.278 | -3.796849 1.154981   |
| _cons      | 46.888    | 4.400184  | 10.66 | 0.000 | 37.67831 56.09769    |

. estat dwatson

Durbin-Watson d-statistic( 6, 25) = 2.520066

. dwe

Durbin-Watson test with normal p value

| dw     | Prob < dw | Prob > dw |
|--------|-----------|-----------|
| 2.5201 | 0.6109    | 0.3891    |

C. Organization 2 (recent adoption of RAI assessments)

1) fall

. regress fall b1 b2 b3 b4 b5

| Source   | SS         | df | MS         | Number of obs = | 25      |
|----------|------------|----|------------|-----------------|---------|
| Model    | 157.518316 | 5  | 31.5036631 | F( 5, 19) =     | 0.81    |
| Residual | 737.968174 | 19 | 38.8404302 | Prob > F =      | 0.5562  |
|          |            |    |            | R-squared =     | 0.1759  |
|          |            |    |            | Adj R-squared = | -0.0410 |
| Total    | 895.48649  | 24 | 37.3119371 | Root MSE =      | 6.2322  |

| fall  | Coef.     | Std. Err. | t     | P> t  | [95% Conf. Interval] |          |
|-------|-----------|-----------|-------|-------|----------------------|----------|
| b1    | -.7611428 | 1.489783  | -0.51 | 0.615 | -3.879294            | 2.357009 |
| b2    | 5.167088  | 5.812895  | 0.89  | 0.385 | -6.999442            | 17.33362 |
| b3    | 1.080538  | 1.559763  | 0.69  | 0.497 | -2.184084            | 4.345161 |
| b4    | -1.98504  | 6.65824   | -0.30 | 0.769 | -15.9209             | 11.95082 |
| b5    | -.5345384 | 1.559763  | -0.34 | 0.736 | -3.799161            | 2.730084 |
| _cons | 23.564    | 5.801871  | 4.06  | 0.001 | 11.42054             | 35.70746 |

. estat dwatson

Durbin-Watson d-statistic( 6, 25) = 2.725266

. dwe

Durbin-Watson test with normal p value

| dw     | Prob < dw | Prob > dw |
|--------|-----------|-----------|
| 2.7253 | 0.8061    | 0.1939    |

2) pain

. regress pain b1 b2 b3 b4 b5

| Source   | SS         | df | MS         | Number of obs = | 25     |
|----------|------------|----|------------|-----------------|--------|
| Model    | 937.112819 | 5  | 187.422564 | F( 5, 19) =     | 13.55  |
| Residual | 262.757409 | 19 | 13.8293373 | Prob > F =      | 0.0000 |
|          |            |    |            | R-squared =     | 0.7810 |
|          |            |    |            | Adj R-squared = | 0.7234 |
| Total    | 1199.87023 | 24 | 49.9945928 | Root MSE =      | 3.7188 |

| pain  | Coef.     | Std. Err. | t     | P> t  | [95% Conf. Interval] |           |
|-------|-----------|-----------|-------|-------|----------------------|-----------|
| b1    | -.042     | .8889589  | -0.05 | 0.963 | -1.902612            | 1.818612  |
| b2    | -13.95372 | 3.468576  | -4.02 | 0.001 | -21.21353            | -6.693906 |
| b3    | -.0094835 | .9307165  | -0.01 | 0.992 | -1.957496            | 1.938529  |
| b4    | -.2629962 | 3.972996  | -0.07 | 0.948 | -8.578572            | 8.052579  |
| b5    | .3046263  | .9307165  | 0.33  | 0.747 | -1.643386            | 2.252638  |
| _cons | 22.45533  | 3.461997  | 6.49  | 0.000 | 15.20929             | 29.70138  |

. estat dwatson

Durbin-Watson d-statistic( 6, 25) = 1.997092

. dwe

Durbin-Watson test with normal p value

| dw     | Prob < dw | Prob > dw |
|--------|-----------|-----------|
| 1.9971 | 0.1293    | 0.8707    |

### 3) depression

. regress depression b1 b2 b3 b4 b5

| Source   | SS         | df | MS         | Number of obs = | 25     |
|----------|------------|----|------------|-----------------|--------|
| Model    | 1861.67762 | 5  | 372.335524 | F( 5, 19) =     | 11.03  |
| Residual | 641.203844 | 19 | 33.7475708 | Prob > F =      | 0.0000 |
|          |            |    |            | R-squared =     | 0.7438 |
|          |            |    |            | Adj R-squared = | 0.6764 |
| Total    | 2502.88146 | 24 | 104.286728 | Root MSE =      | 5.8093 |

| depression | Coef.     | Std. Err. | t     | P> t  | [95% Conf. Interval] |
|------------|-----------|-----------|-------|-------|----------------------|
| b1         | -2.323143 | 1.38868   | -1.67 | 0.111 | -5.229684 .5833983   |
| b2         | -6.255348 | 5.418408  | -1.15 | 0.263 | -17.59621 5.085511   |
| b3         | 4.714571  | 1.453912  | 3.24  | 0.004 | 1.671499 7.757643    |
| b4         | -5.319033 | 6.206384  | -0.86 | 0.402 | -18.30914 7.671079   |
| b5         | -2.023715 | 1.453912  | -1.39 | 0.180 | -5.066786 1.019357   |
| _cons      | 29.96267  | 5.408132  | 5.54  | 0.000 | 18.64332 41.28202    |

. estat dwatson

Durbin-Watson d-statistic( 6, 25) = 2.380314

. dwe

Durbin-Watson test with normal p value

| dw     | Prob < dw | Prob > dw |
|--------|-----------|-----------|
| 2.3803 | 0.4595    | 0.5405    |
